# Supplementary material for: Risk Factors for Exposure of Wild Birds to West Nile Virus in A Gradient of Wildlife-Livestock Interaction
Source: MDPI journal article supplement (doi:10.3390/pathogens12010083), 2023-01-03
Supplement: s1 [file s1]

**Table S1.** Results of the scientific literature survey of selected studies that used the INGEZIM West Nile COMPAC blocking ELISA (bELISA; Ingenasa, Spain) and performed viral neutralization tests (VNT) against different *Flavivirus* spp. (at least WNV and USUV). The target animal group, the spatial range of surveyed animals and the country where the animals came from are together shown with the number of bELISA analysed samples to show the extent of the study. Studies performed in wild birds are marked in bold letter type.

| Target animal group      | Spatial range                      | Country | No. bELISA tested | No. VNT-confirmed <i>Flavivirus</i> spp. | No. VNT-confirmed WNV | No. VNT-confirmed other <i>Flavivirus</i> spp. | WNV to other <i>Flavivirus</i> spp. predominance ratio | Reference |
|--------------------------|------------------------------------|---------|-------------------|------------------------------------------|-----------------------|------------------------------------------------|--------------------------------------------------------|-----------|
| Feral pigeons            | Córdoba city                       | Spain   | 142               | 6                                        | 3                     | 3 <sup>a</sup>                                 | 50%                                                    | [42]      |
| Wild birds               | Country                            | Poland  | 474               | 63                                       | 63                    | 0                                              | 100%                                                   | [43]      |
| Wild birds               | South-western Spain                | Spain   | 149               | 2                                        | 1                     | 1                                              | 50%                                                    | [44]      |
| Wild ruminants           | Country                            | Spain   | 4693              | 109                                      | 103                   | 6 <sup>b</sup>                                 | 94.5%                                                  | [45]      |
| Wild raptors             | Andalusia                          | Spain   | 123               | 4                                        | 4                     | 0                                              | 100%                                                   | [46]      |
| Domestic dogs            | South-western & west-central Spain | Spain   | 815               | 25                                       | 11                    | 14 <sup>c</sup>                                | 44%                                                    | [47]      |
| <i>Passer domesticus</i> | South-western Spain                | Spain   | 2544              | 18                                       | 17                    | 1 <sup>a</sup>                                 | 94.4%                                                  | [48]      |
| Zoo mammals              | Country                            | Spain   | 570               | 16                                       | 10                    | 6 <sup>d</sup>                                 | 62.5%                                                  | [49]      |
| Horses                   | West-central Spain                 | Spain   | 725               | 154                                      | 143                   | 11 <sup>a</sup>                                | 92.9%                                                  | [5]       |
| Wild birds               | West-central Spain                 | Spain   | 384               | 74                                       | 70                    | 4 <sup>a</sup>                                 | 94.6%                                                  | [36]      |
| Wild birds               | Badajoz city vicinity              | Spain   | 645               | 21                                       | 20                    | 1 <sup>a</sup>                                 | 95.2%                                                  | [37]      |

<sup>a</sup>VNT-confirmed as USUV antibodies; <sup>b</sup>VNT-confirmed as USUV (n=4) and Meaban virus (n=1) antibodies; <sup>c</sup>VNT-confirmed as tick-borne encephalitis virus (TBEV) antibodies; <sup>d</sup>VNT-confirmed as USUV (n=5) and TBEV (n=1) antibodies.

**Table S2.** Total number of captured mosquitoes by genus, study site and interaction gradient in the five study sites. Specific capture data for the two predominant mosquito species, *Culex pipiens* and *Cx. theileri* is shown.

| Site           | Area                    | <i>Culex pipiens</i> | <i>Culex theileri</i> | <i>Culex</i> spp. | Cs.* spp. | An.* spp. | Ae.* spp. | Undt.* | Others | TOTAL |
|----------------|-------------------------|----------------------|-----------------------|-------------------|-----------|-----------|-----------|--------|--------|-------|
| S <sub>1</sub> | A <sub>1</sub>          | 33                   | 17                    | 51                | 0         | 0         | 1         | 1      | 0      | 53    |
|                | A <sub>2</sub>          | 117                  | 63                    | 180               | 1         | 3         | 4         | 12     | 0      | 200   |
|                | A <sub>3</sub>          | 2                    | 3                     | 5                 | 0         | 0         | 0         | 2      | 0      | 7     |
|                | Subtotal S <sub>1</sub> | 152                  | 83                    | 236               | 1         | 3         | 5         | 15     | 0      | 260   |
| S <sub>2</sub> | A <sub>1</sub>          | 19                   | 61                    | 80                | 0         | 14        | 0         | 3      | 0      | 97    |
|                | A <sub>2</sub>          | 23                   | 29                    | 52                | 1         | 7         | 2         | 2      | 0      | 64    |
|                | A <sub>3</sub>          | 36                   | 41                    | 77                | 3         | 3         | 3         | 10     | 0      | 96    |
|                | Subtotal S <sub>2</sub> | 78                   | 131                   | 209               | 4         | 24        | 5         | 15     | 0      | 257   |
| S <sub>3</sub> | A <sub>1</sub>          | 77                   | 35                    | 112               | 3         | 1         | 12        | 3      | 0      | 131   |
|                | A <sub>2</sub>          | 34                   | 5                     | 39                | 1         | 0         | 1         | 1      | 0      | 42    |
|                | A <sub>3</sub>          | 22                   | 3                     | 26                | 0         | 1         | 6         | 5      | 0      | 38    |
|                | Subtotal S <sub>3</sub> | 133                  | 43                    | 177               | 4         | 2         | 19        | 9      | 0      | 211   |
| S <sub>4</sub> | A <sub>1</sub>          | 1                    | 17                    | 18                | 1         | 0         | 8         | 3      | 0      | 30    |
|                | A <sub>2</sub>          | 14                   | 0                     | 14                | 0         | 0         | 2         | 2      | 0      | 18    |
|                | A <sub>3</sub>          | 28                   | 15                    | 43                | 2         | 3         | 21        | 2      | 0      | 71    |
|                | Subtotal S <sub>4</sub> | 43                   | 32                    | 75                | 3         | 3         | 31        | 7      | 0      | 119   |
| S <sub>5</sub> | A <sub>1</sub>          | 70                   | 66                    | 138               | 7         | 3         | 16        | 7      | 0      | 171   |
|                | A <sub>2</sub>          | 171                  | 30                    | 202               | 3         | 6         | 21        | 11     | 0      | 243   |
|                | A <sub>3</sub>          | 212                  | 100                   | 312               | 8         | 5         | 23        | 19     | 1      | 368   |
|                | Subtotal S <sub>5</sub> | 453                  | 196                   | 652               | 18        | 14        | 60        | 37     | 1      | 782   |
| All            | A <sub>1</sub>          | 200                  | 196                   | 399               | 11        | 18        | 37        | 17     | 0      | 482   |
|                | A <sub>2</sub>          | 359                  | 127                   | 487               | 6         | 16        | 30        | 28     | 0      | 567   |
|                | A <sub>3</sub>          | 300                  | 162                   | 463               | 13        | 12        | 53        | 38     | 1      | 580   |
| Total          |                         | 859                  | 485                   | 1349              | 30        | 46        | 120       | 83     | 1      | 1629  |

\*Cs.: *Culiseta* spp.; An.: *Anopheles* spp.; Ae.: *Aedes* spp.; Undt.: Undetermined genus.

**Table S3.** Number of birds caught per site (S<sub>1</sub>-S<sub>5</sub>), area (A<sub>1</sub>-A<sub>3</sub>) and family and results of blocking ELISA (serum) and rRT-PCR (feather cannon pulp, oral or cloacal swab).

| Site           | Area           | Bird family           | No. captures | bELISA<br>No. tested<br>/No. positive | rRT-PCR<br>No. tested<br>/No. positive | bELISA<br>No. tested<br>/No. positive<br>(Prevalence) | rRT-PCR<br>No. tested<br>/No. positive<br>(Prevalence) |
|----------------|----------------|-----------------------|--------------|---------------------------------------|----------------------------------------|-------------------------------------------------------|--------------------------------------------------------|
| S <sub>1</sub> | A <sub>1</sub> | <i>Corvidae</i>       | 10           | 10/1                                  | 10/0                                   |                                                       |                                                        |
|                |                | <i>Emberizidae</i>    | 1            | 1/0                                   | 1/0                                    |                                                       |                                                        |
|                |                | <i>Fringilidae</i>    | 3            | 3/0                                   | 1/0                                    |                                                       |                                                        |
|                |                | <i>Fringillidae</i>   | 4            | 3/0                                   | 3/0                                    |                                                       |                                                        |
|                |                | <i>Hirundidae</i>     | 1            | 1/0                                   | 1/0                                    |                                                       |                                                        |
|                |                | <i>Paridae</i>        | 5            | 5/3                                   | 5/0                                    | 34/4                                                  | 33/0                                                   |
|                |                | <i>Passeridae</i>     | 7            | 7/0                                   | 6/0                                    | (12.9%)                                               | (0%)                                                   |
|                |                | <i>Phylloscopidae</i> | 1            | 0/0                                   | 1/0                                    |                                                       |                                                        |
|                |                | <i>Sittidae</i>       | 1            | 1/0                                   | 1/0                                    |                                                       |                                                        |
|                |                | <i>Sylviidae</i>      | 1            | 1/0                                   | 1/0                                    |                                                       |                                                        |
|                |                | <i>Turdidae</i>       | 1            | 1/0                                   | 1/0                                    |                                                       |                                                        |
|                |                | <i>Upupidae</i>       | 1            | 1/0                                   | 1/0                                    |                                                       |                                                        |
|                | A <sub>2</sub> | <i>Acrocephalidae</i> | 2            | 0/0                                   | 2/0                                    |                                                       |                                                        |
|                |                | <i>Cettidae</i>       | 3            | 0/0                                   | 3/0                                    |                                                       |                                                        |
|                |                | <i>Cisticolidae</i>   | 1            | 0/0                                   | 1/0                                    |                                                       |                                                        |
|                |                | <i>Emberizidae</i>    | 3            | 0/0                                   | 3/0                                    |                                                       |                                                        |
|                |                | <i>Fringilidae</i>    | 1            | 1/0                                   | 1/0                                    |                                                       |                                                        |
|                |                | <i>Hirundidae</i>     | 2            | 0/0                                   | 2/0                                    | 7/0                                                   | 28/0                                                   |
|                |                | <i>Laniidae</i>       | 3            | 3/0                                   | 3/0                                    | (0%)                                                  | (0%)                                                   |
|                |                | <i>Paridae</i>        | 3            | 1/0                                   | 3/0                                    |                                                       |                                                        |
|                |                | <i>Passeridae</i>     | 1            | 1/0                                   | 1/0                                    |                                                       |                                                        |
|                |                | <i>Sturnidae</i>      | 1            | 1/0                                   | 1/0                                    |                                                       |                                                        |
|                |                | <i>Sylviidae</i>      | 8            | 0/0                                   | 8/0                                    |                                                       |                                                        |
|                | A <sub>3</sub> | <i>Acrocephalidae</i> | 1            | 0/0                                   | 1/0                                    |                                                       |                                                        |
|                |                | <i>Aegithalidae</i>   | 3            | 0/0                                   | 3/0                                    |                                                       |                                                        |
|                |                | <i>Corvidae</i>       | 5            | 5/0                                   | 5/0                                    |                                                       |                                                        |
|                |                | <i>Motacillidae</i>   | 1            | 1/0                                   | 1/0                                    |                                                       |                                                        |
|                |                | <i>Muscicapidae</i>   | 1            | 1/0                                   | 1/0                                    |                                                       |                                                        |
|                |                | <i>Paridae</i>        | 14           | 6/1                                   | 14/0                                   | 20/2                                                  | 33/0                                                   |
|                |                | <i>Phylloscopidae</i> | 1            | 1/0                                   | 1/0                                    | (10%)                                                 | (0%)                                                   |
|                |                | <i>Sittidae</i>       | 1            | 1/0                                   | 1/0                                    |                                                       |                                                        |
|                |                | <i>Sturnidae</i>      | 1            | 1/0                                   | 1/0                                    |                                                       |                                                        |
|                |                | <i>Sylviidae</i>      | 3            | 1/0                                   | 3/0                                    |                                                       |                                                        |
|                |                | <i>Turdidae</i>       | 3            | 3/1                                   | 2/0                                    |                                                       |                                                        |
| S <sub>2</sub> | A <sub>1</sub> | <i>Fringillidae</i>   | 4            | 3/1                                   | 4/0                                    |                                                       |                                                        |
|                |                | <i>Hirundidae</i>     | 8            | 8/0                                   | 6/0                                    |                                                       |                                                        |
|                |                | <i>Laniidae</i>       | 4            | 4/0                                   | 4/0                                    |                                                       |                                                        |
|                |                | <i>Paridae</i>        | 9            | 4/0                                   | 8/0                                    | 48/2                                                  | 43/0                                                   |
|                |                | <i>Passeridae</i>     | 19           | 18/0                                  | 14/0                                   | (4.2%)                                                | (0%)                                                   |
|                |                | <i>Sturnidae</i>      | 2            | 2/0                                   | 2/0                                    |                                                       |                                                        |
|                |                | <i>Sylviidae</i>      | 4            | 3/0                                   | 2/0                                    |                                                       |                                                        |
|                |                | <i>Turdidae</i>       | 6            | 6/1                                   | 3/0                                    |                                                       |                                                        |
|                | A <sub>2</sub> | <i>Aegithalidae</i>   | 5            | 1/0                                   | 5/0                                    | 44/2                                                  | 58/1                                                   |
|                |                | <i>Corvidae</i>       | 5            | 5/0                                   | 5/0                                    | (4.5%)                                                | (1.7%)                                                 |

|                |                |                       |    |      |      |                 |                |
|----------------|----------------|-----------------------|----|------|------|-----------------|----------------|
| S <sub>3</sub> | A <sub>3</sub> | <i>Emberizidae</i>    | 1  | 1/0  | 1/0  |                 |                |
|                |                | <i>Paridae</i>        | 28 | 15/1 | 25/0 |                 |                |
|                |                | <i>Phylloscopidae</i> | 3  | 2/0  | 1/0  |                 |                |
|                |                | <i>Sturnidae</i>      | 1  | 1/0  | 1/0  |                 |                |
|                |                | <i>Sylviidae</i>      | 7  | 3/0  | 7/0  |                 |                |
|                |                | <i>Turdidae</i>       | 17 | 16/1 | 13/1 |                 |                |
|                |                | <hr/>                 |    |      |      |                 |                |
|                | A <sub>3</sub> | <i>Corvidae</i>       | 6  | 6/0  | 5/0  |                 |                |
|                |                | <i>Emberizidae</i>    | 2  | 2/0  | 2/0  |                 |                |
|                |                | <i>Hirundinidae</i>   | 1  | 1/0  | 0/0  |                 |                |
|                |                | <i>Laniidae</i>       | 2  | 1/0  | 2/0  | 27/0<br>(0%)    | 34/0<br>(0%)   |
|                |                | <i>Paridae</i>        | 22 | 14/0 | 22/0 |                 |                |
|                |                | <i>Sylviidae</i>      | 3  | 1/0  | 2/0  |                 |                |
|                |                | <i>Turdidae</i>       | 2  | 2/0  | 1/0  |                 |                |
|                |                | <hr/>                 |    |      |      |                 |                |
|                | A <sub>1</sub> | <i>Emberizidae</i>    | 2  | 2/0  | 2/0  |                 |                |
|                |                | <i>Fringillidae</i>   | 6  | 3/2  | 4/0  |                 |                |
|                |                | <i>Muscicapidae</i>   | 1  | 1/0  | 1/0  |                 |                |
|                |                | <i>Oriolidae</i>      | 1  | 1/0  | 1/0  | 18/3<br>(16.7%) | 37/1<br>(2.7%) |
|                |                | <i>Paridae</i>        | 7  | 4/0  | 7/0  |                 |                |
|                |                | <i>Phylloscopidae</i> | 1  | 1/0  | 1/0  |                 |                |
|                |                | <i>Sylviidae</i>      | 2  | 2/0  | 2/0  |                 |                |
|                |                | <i>Turdidae</i>       | 4  | 4/1  | 4/1  |                 |                |
|                |                | <hr/>                 |    |      |      |                 |                |
|                | A <sub>2</sub> | <i>Aegithalidae</i>   | 2  | 1/0  | 2/0  |                 |                |
|                |                | <i>Corvidae</i>       | 1  | 1/0  | 1/0  |                 |                |
|                |                | <i>Emberizidae</i>    | 12 | 7/1  | 10/1 |                 |                |
|                |                | <i>Fringillidae</i>   | 5  | 5/0  | 3/0  |                 |                |
|                |                | <i>Muscicapidae</i>   | 3  | 2/0  | 3/0  | 32/1<br>(3.1%)  | 37/1<br>(2.7%) |
|                |                | <i>Paridae</i>        | 14 | 10/0 | 10/0 |                 |                |
|                |                | <i>Passeridae</i>     | 3  | 3/0  | 3/0  |                 |                |
|                |                | <i>Sittidae</i>       | 1  | 0/0  | 1/0  |                 |                |
|                |                | <i>Sylviidae</i>      | 2  | 1/0  | 2/0  |                 |                |
|                |                | <i>Turdidae</i>       | 2  | 2/0  | 2/0  |                 |                |
|                |                | <hr/>                 |    |      |      |                 |                |
|                | A <sub>3</sub> | <i>Aegithalidae</i>   | 4  | 2/0  | 3/0  |                 |                |
|                |                | <i>Cettidae</i>       | 1  | 1/0  | 1/0  |                 |                |
|                |                | <i>Emberizidae</i>    | 1  | 0/0  | 0/0  |                 |                |
|                |                | <i>Fringillidae</i>   | 4  | 3/0  | 4/0  |                 |                |
|                |                | <i>Laniidae</i>       | 2  | 2/0  | 1/0  |                 |                |
|                |                | <i>Muscicapidae</i>   | 4  | 4/0  | 2/0  | 32/0<br>(0%)    | 32/0<br>(0%)   |
|                |                | <i>Paridae</i>        | 8  | 7/0  | 8/0  |                 |                |
|                |                | <i>Passeridae</i>     | 4  | 3/0  | 4/0  |                 |                |
|                |                | <i>Phylloscopidae</i> | 1  | 1/0  | 1/0  |                 |                |
|                |                | <i>Prunellidae</i>    | 1  | 1/0  | 1/0  |                 |                |
|                |                | <i>Sylviidae</i>      | 5  | 5/0  | 4/0  |                 |                |
|                |                | <i>Turdidae</i>       | 3  | 3/0  | 3/0  |                 |                |
|                |                | <hr/>                 |    |      |      |                 |                |
| S <sub>4</sub> | A <sub>1</sub> | <i>Paridae</i>        | 5  | 5/1  | 5/0  | 23/3<br>(13%)   | 22/0<br>(0%)   |
|                |                | <i>Passeridae</i>     | 17 | 16/2 | 15/0 |                 |                |
|                |                | <i>Sittidae</i>       | 2  | 2/0  | 2/0  |                 |                |
|                | A <sub>2</sub> | <i>Columbidae</i>     | 15 | 15/0 | 14/0 | 25/1<br>(4%)    | 24/0<br>(0%)   |
|                |                | <i>Passeridae</i>     | 10 | 10/1 | 10/0 |                 |                |
|                |                | <i>Aegithalidae</i>   | 6  | 0/0  | 6/0  |                 |                |
|                | A <sub>3</sub> | <i>Certhiidae</i>     | 2  | 2/0  | 2/0  |                 |                |
|                |                | <i>Fringillidae</i>   | 5  | 5/0  | 5/0  | 34/1<br>(2.9%)  | 45/0<br>(0%)   |
|                |                | <i>Muscicapidae</i>   | 6  | 6/0  | 6/0  |                 |                |
|                |                | <i>Paridae</i>        | 26 | 21/1 | 26/0 |                 |                |
|                |                | <hr/>                 |    |      |      |                 |                |

|                |                |                       |    |      |      |                 |                |
|----------------|----------------|-----------------------|----|------|------|-----------------|----------------|
| S <sub>5</sub> | A <sub>1</sub> | <i>Hirundidae</i>     | 8  | 7/0  | 7/0  | 32/2<br>(6.3%)  | 32/0<br>(0%)   |
|                |                | <i>Paridae</i>        | 1  | 1/0  | 1/0  |                 |                |
|                |                | <i>Passeridae</i>     | 25 | 24/2 | 24/0 |                 |                |
|                | A <sub>2</sub> | <i>Aegithalidae</i>   | 1  | 1/0  | 1/0  | 35/4<br>(11.4%) | 30/1<br>(3.3%) |
|                |                | <i>Alcedinidae</i>    | 1  | 1/0  | 1/0  |                 |                |
|                |                | <i>Certhiidae</i>     | 3  | 3/0  | 3/0  |                 |                |
|                |                | <i>Cettidae</i>       | 1  | 0/0  | 0/0  |                 |                |
|                |                | <i>Corvidae</i>       | 1  | 1/0  | 1/0  |                 |                |
|                |                | <i>Fringillidae</i>   | 2  | 1/0  | 0/0  |                 |                |
|                |                | <i>Muscicapidae</i>   | 1  | 1/0  | 1/1  |                 |                |
|                |                | <i>Paridae</i>        | 16 | 15/2 | 15/0 |                 |                |
|                |                | <i>Phylloscopidae</i> | 7  | 7/0  | 3/0  |                 |                |
|                |                | <i>Sylviidae</i>      | 2  | 2/0  | 2/0  |                 |                |
|                |                | <i>Turdidae</i>       | 3  | 3/2  | 3/0  |                 |                |
|                | A <sub>3</sub> | <i>Certhiidae</i>     | 1  | 1/0  | 1/0  | 25/5<br>(20%)   | 26/0<br>(0%)   |
|                |                | <i>Corvidae</i>       | 2  | 2/0  | 1/0  |                 |                |
|                |                | <i>Laniidae</i>       | 1  | 1/0  | 1/0  |                 |                |
|                |                | <i>Paridae</i>        | 18 | 17/5 | 18/0 |                 |                |
|                |                | <i>Sylviidae</i>      | 7  | 5/0  | 5/0  |                 |                |

**Table S4.** Bird abundance indices per site and wildlife-livestock interaction scenario throughout bird taxonomic Order and Family. Within each taxonomic level, the highest abundance index of the three interaction scenarios is shown in bolded type letter case.

| Order           | Family                | S <sub>1</sub> |                |                | S <sub>2</sub> |                |                | S <sub>3</sub> |                |                | S <sub>4</sub> |                |                | S <sub>5</sub> |                |                | S <sub>1</sub> -S <sub>5</sub> |                |                |
|-----------------|-----------------------|----------------|----------------|----------------|----------------|----------------|----------------|----------------|----------------|----------------|----------------|----------------|----------------|----------------|----------------|----------------|--------------------------------|----------------|----------------|
|                 |                       | A <sub>1</sub> | A <sub>2</sub> | A <sub>3</sub> | A <sub>1</sub> | A <sub>2</sub> | A <sub>3</sub> | A <sub>1</sub> | A <sub>2</sub> | A <sub>3</sub> | A <sub>1</sub> | A <sub>2</sub> | A <sub>3</sub> | A <sub>1</sub> | A <sub>2</sub> | A <sub>3</sub> | A <sub>1</sub>                 | A <sub>2</sub> | A <sub>3</sub> |
| Passeriformes   | <i>Passeridae</i>     | <b>2.583</b>   | 0.250          | 0.000          | <b>14.333</b>  | 0.000          | 3.188          | 0.250          | 0.000          | <b>0.813</b>   | <b>4.583</b>   | 1.000          | 0.313          | <b>22.750</b>  | 10.250         | 1.771          | <b>8.900</b>                   | 2.300          | 1.217          |
|                 | <i>Hirundinidae</i>   | <b>0.917</b>   | 0.500          | 0.250          | 0.354          | 0.125          | <b>0.417</b>   | 0.000          | 0.000          | 0.000          | <b>0.417</b>   | 0.083          | 0.000          | 3.396          | <b>3.458</b>   | 0.229          | <b>1.017</b>                   | 0.833          | 0.179          |
|                 | <i>Lanidae</i>        | <b>0.979</b>   | 0.563          | 0.500          | 0.542          | 0.875          | <b>1.188</b>   | 0.063          | 0.000          | <b>0.333</b>   | <b>0.938</b>   | 0.333          | 0.208          | 3.396          | <b>6.083</b>   | 0.542          | 1.183                          | <b>1.571</b>   | 0.554          |
|                 | <i>Alaudidae</i>      | 0.271          | <b>0.875</b>   | 0.083          | 0.646          | 0.146          | <b>0.896</b>   | <b>0.896</b>   | 0.479          | 0.063          | <b>0.688</b>   | 0.208          | 0.625          | 0.000          | 0.000          | 0.000          | <b>0.500</b>                   | 0.342          | 0.333          |
|                 | <i>Aegithalidae</i>   | 0.250          | 0.063          | <b>0.583</b>   | 0.000          | 0.000          | 0.000          | <b>0.250</b>   | 0.000          | 0.125          | 0.000          | 0.083          | <b>0.417</b>   | 0.000          | <b>3.042</b>   | 0.125          | 0.100                          | <b>0.638</b>   | 0.250          |
|                 | <i>Emberizidae</i>    | <b>1.167</b>   | 1.042          | 0.667          | 0.313          | 0.000          | <b>0.896</b>   | <b>0.938</b>   | 0.875          | 0.000          | <b>4.250</b>   | 0.229          | 0.813          | <b>1.667</b>   | 0.000          | 0.000          | <b>1.667</b>                   | 0.429          | 0.475          |
|                 | <i>Motacillidae</i>   | 0.000          | 0.000          | 0.000          | 0.000          | 0.000          | 0.000          | 0.000          | 0.000          | 0.000          | 0.000          | 0.000          | 0.000          | <b>0.458</b>   | 0.000          | 0.083          | <b>0.092</b>                   | 0.000          | 0.017          |
|                 | <i>Turdidae</i>       | 0.167          | 0.125          | <b>0.271</b>   | 0.000          | <b>0.958</b>   | 0.000          | 0.292          | 0.125          | <b>0.604</b>   | 0.000          | 0.000          | <b>0.229</b>   | 0.083          | <b>0.625</b>   | 0.063          | 0.108                          | <b>0.367</b>   | 0.233          |
|                 | <i>Paridae</i>        | 0.938          | <b>1.375</b>   | 0.729          | 0.146          | <b>0.188</b>   | 0.083          | <b>1.188</b>   | 1.021          | <b>1.188</b>   | 0.542          | 0.313          | <b>1.417</b>   | 0.146          | <b>2.583</b>   | 0.625          | 0.592                          | <b>1.096</b>   | 0.808          |
|                 | <i>Sturnidae</i>      | 1.375          | <b>1.792</b>   | 0.063          | 1.813          | <b>3.583</b>   | 0.000          | <b>3.229</b>   | 0.708          | 0.000          | 0.188          | 0.438          | <b>1.729</b>   | 83.313         | <b>137.500</b> | 2.083          | 17.983                         | <b>28.804</b>  | 0.775          |
|                 | <i>Sylviidae</i>      | 0.063          | <b>0.125</b>   | <b>0.125</b>   | 0.063          | <b>0.292</b>   | 0.083          | 0.000          | <b>0.292</b>   | 0.083          | 0.000          | 0.063          | <b>0.146</b>   | 0.000          | 0.458          | <b>0.729</b>   | 0.025                          | <b>0.246</b>   | 0.233          |
|                 | <i>Corvidae</i>       | <b>0.333</b>   | 0.188          | 0.167          | 1.313          | <b>8.833</b>   | 3.458          | 0.438          | 0.125          | <b>0.979</b>   | 0.063          | 0.000          | <b>0.188</b>   | 0.500          | <b>2.750</b>   | 1.896          | 0.529                          | <b>2.379</b>   | 1.338          |
|                 | <i>Cisticolidae</i>   | 0.000          | 0.000          | 0.000          | 0.000          | 0.000          | 0.000          | <b>0.083</b>   | 0.000          | 0.000          | 0.000          | 0.000          | 0.000          | 0.000          | 0.000          | <b>0.063</b>   | <b>0.017</b>                   | 0.000          | 0.013          |
|                 | <i>Fringillidae</i>   | 0.729          | <b>0.771</b>   | 0.292          | 0.229          | 0.229          | <b>0.688</b>   | 0.458          | 0.854          | <b>5.500</b>   | 1.313          | 0.313          | <b>1.438</b>   | <b>0.583</b>   | 0.375          | 0.313          | 0.663                          | 0.508          | <b>1.646</b>   |
|                 | <i>Sittidae</i>       | 0.000          | 0.000          | <b>0.063</b>   | 0.000          | 0.000          | 0.000          | 0.167          | 0.375          | <b>0.438</b>   | <b>0.125</b>   | 0.083          | 0.083          | 0.000          | 0.000          | 0.000          | 0.058                          | 0.092          | <b>0.117</b>   |
|                 | <i>Muscicapidae</i>   | 0.000          | <b>0.292</b>   | 0.000          | 0.000          | 0.000          | 0.000          | 0.000          | <b>0.083</b>   | <b>0.083</b>   | 0.000          | <b>0.417</b>   | 0.292          | <b>0.083</b>   | 0.000          | <b>0.083</b>   | 0.017                          | <b>0.158</b>   | 0.092          |
|                 | <i>Cettidae</i>       | <b>0.208</b>   | 0.146          | 0.000          | 0.000          | 0.000          | 0.000          | 0.000          | 0.000          | 0.000          | 0.000          | 0.000          | 0.000          | 0.000          | 0.000          | <b>0.083</b>   | <b>0.042</b>                   | 0.029          | 0.017          |
|                 | <i>Oriolidae</i>      | 0.000          | 0.083          | <b>0.229</b>   | 0.000          | 0.000          | 0.000          | 0.229          | <b>0.542</b>   | 0.000          | 0.000          | 0.000          | 0.000          | 0.000          | 0.000          | 0.000          | 0.046                          | <b>0.125</b>   | 0.046          |
|                 | <i>Acrocephalidae</i> | 0.000          | <b>0.313</b>   | 0.000          | 0.000          | 0.000          | 0.000          | 0.000          | 0.000          | 0.000          | 0.000          | 0.000          | 0.000          | <b>0.083</b>   | 0.000          | 0.000          | 0.017                          | <b>0.063</b>   | 0.000          |
|                 | <i>Phylloscopidae</i> | 0.000          | 0.000          | 0.000          | 0.000          | 0.000          | 0.000          | 0.000          | 0.000          | 0.000          | 0.000          | 0.000          | 0.000          | 0.000          | 0.000          | 0.000          | 0.000                          | 0.000          | 0.000          |
|                 | <i>Subtotal</i>       | <b>9.979</b>   | <b>8.500</b>   | <b>4.021</b>   | <b>19.750</b>  | <b>15.229</b>  | <b>10.896</b>  | <b>8.479</b>   | <b>5.479</b>   | <b>10.208</b>  | <b>13.104</b>  | <b>3.563</b>   | <b>7.896</b>   | <b>116.458</b> | <b>167.125</b> | <b>8.688</b>   | <b>33.554</b>                  | <b>39.979</b>  | <b>8.342</b>   |
| Columbiformes   | <i>Columbidae</i>     | <b>2.083</b>   | 1.146          | 0.979          | 0.125          | <b>0.750</b>   | 0.646          | <b>0.750</b>   | 0.083          | 0.375          | 0.208          | 0.125          | <b>0.500</b>   | <b>3.021</b>   | 1.417          | 1.104          | <b>1.238</b>                   | 0.704          | 0.721          |
| Charadriiformes | <i>Charadriidae</i>   | 0.000          | <b>0.125</b>   | 0.000          | 0.000          | 0.000          | 0.000          | 0.000          | 0.000          | 0.000          | 0.000          | 0.000          | 0.000          | 0.000          | 0.000          | 0.000          | 0.000                          | <b>0.025</b>   | 0.000          |
| Cuculiformes    | <i>Cuculidae</i>      | <b>0.063</b>   | 0.000          | 0.000          | 0.000          | 0.000          | 0.000          | <b>0.063</b>   | 0.000          | 0.000          | 0.000          | 0.000          | 0.000          | 0.000          | 0.000          | 0.000          | <b>0.025</b>                   | 0.000          | 0.000          |
| Apodiformes     | <i>Apodidae</i>       | 0.063          | 0.000          | <b>0.167</b>   | 0.000          | <b>0.063</b>   | 0.000          | 0.000          | 0.000          | 0.000          | 0.000          | 0.000          | 0.000          | 0.000          | 0.000          | 0.000          | 0.013                          | 0.013          | <b>0.033</b>   |
| Bucerotiformes  | <i>Upupidae</i>       | <b>0.292</b>   | 0.208          | 0.083          | 0.000          | <b>0.563</b>   | 0.083          | <b>0.063</b>   | 0.000          | 0.000          | 0.000          | 0.000          | <b>0.125</b>   | <b>0.646</b>   | 0.000          | 0.000          | <b>0.200</b>                   | 0.154          | 0.058          |
| Piciformes      | <i>Picidae</i>        | 0.083          | <b>0.167</b>   | 0.000          | 0.000          | <b>0.125</b>   | 0.000          | 0.000          | <b>0.271</b>   | 0.188          | 0.000          | 0.000          | 0.000          | 0.000          | 0.000          | 0.000          | 0.017                          | <b>0.113</b>   | 0.038          |
| Accipitriformes | <i>Accipitridae</i>   | 0.000          | <b>0.313</b>   | 0.000          | 0.000          | <b>0.083</b>   | 0.000          | 0.000          | 0.000          | <b>0.063</b>   | 0.000          | 0.000          | 0.000          | 0.063          | 0.000          | <b>0.083</b>   | 0.013                          | <b>0.079</b>   | 0.029          |
| Coraciiformes   | <i>Meropidae</i>      | 0.000          | <b>5.250</b>   | 0.313          | 0.000          | 0.000          | 0.000          | 0.000          | 0.000          | 0.000          | 0.375          | <b>0.604</b>   | 0.000          | <b>0.146</b>   | 0.083          | 0.125          | 0.104                          | <b>1.188</b>   | 0.088          |

|                         |                          |        |        |       |        |        |        |       |       |        |        |       |       |         |         |        |        |        |       |
|-------------------------|--------------------------|--------|--------|-------|--------|--------|--------|-------|-------|--------|--------|-------|-------|---------|---------|--------|--------|--------|-------|
|                         | <i>Alcedinidae</i>       | 0.000  | 0.000  | 0.000 | 0.000  | 0.000  | 0.000  | 0.000 | 0.000 | 0.000  | 0.000  | 0.000 | 0.000 | 0.000   | 1.375   | 0.000  | 0.000  | 0.275  | 0.000 |
|                         | <i>Subtotal</i>          | 0.000  | 5.250  | 0.313 | 0.000  | 0.000  | 0.000  | 0.000 | 0.000 | 0.000  | 0.375  | 0.604 | 0.000 | 0.146   | 1.458   | 0.125  | 0.104  | 1.463  | 0.088 |
| <b>Suliformes</b>       | <i>Phalacrocoracidae</i> | 0.000  | 0.000  | 0.000 | 0.000  | 0.000  | 0.000  | 0.000 | 0.000 | 0.000  | 0.000  | 0.000 | 0.000 | 0.063   | 0.000   | 0.000  | 0.013  | 0.000  | 0.000 |
| <b>Pelecaniformes</b>   | <i>Ardeidae</i>          | 0.000  | 0.000  | 0.000 | 0.000  | 0.000  | 0.000  | 0.000 | 0.000 | 0.000  | 0.000  | 0.000 | 0.167 | 0.000   | 0.000   | 0.000  | 0.000  | 0.000  | 0.033 |
| <b>Ciconiidformes</b>   | <i>Ciconiidae</i>        | 0.000  | 0.000  | 0.000 | 0.000  | 0.000  | 0.000  | 0.000 | 0.000 | 0.000  | 0.000  | 0.000 | 0.063 | 0.000   | 0.000   | 0.146  | 0.000  | 0.000  | 0.042 |
| <b>Gruiformes</b>       | <i>Rallidae</i>          | 0.000  | 0.000  | 0.000 | 0.000  | 0.000  | 0.000  | 0.000 | 0.000 | 0.000  | 0.000  | 0.000 | 0.000 | 0.333   | 0.000   | 0.000  | 0.067  | 0.000  | 0.000 |
|                         | <i>Gruidae</i>           | 0.000  | 0.000  | 0.000 | 0.000  | 0.000  | 0.000  | 0.000 | 0.000 | 0.000  | 2.021  | 0.000 | 0.438 | 2.250   | 0.000   | 0.000  | 0.854  | 0.000  | 0.088 |
|                         | <i>Subtotal</i>          | 0.000  | 0.000  | 0.000 | 0.000  | 0.000  | 0.000  | 0.000 | 0.000 | 0.000  | 2.021  | 0.000 | 0.438 | 2.583   | 0.000   | 0.000  | 0.921  | 0.000  | 0.088 |
| <b>Podicipediformes</b> | <i>Podicipediformes</i>  | 0.000  | 0.000  | 0.000 | 0.000  | 0.000  | 0.000  | 0.000 | 0.000 | 0.000  | 0.000  | 0.000 | 0.000 | 0.229   | 0.000   | 0.000  | 0.046  | 0.000  | 0.000 |
| <b>Anseriformes</b>     | <i>Anatidae</i>          | 0.000  | 0.000  | 0.000 | 0.000  | 0.000  | 0.000  | 0.125 | 0.000 | 0.000  | 0.000  | 0.000 | 0.000 | 0.000   | 0.000   | 0.000  | 0.025  | 0.000  | 0.000 |
| <b>Galliformes</b>      | <i>Phasianidae</i>       | 0.000  | 0.000  | 0.083 | 0.000  | 0.000  | 0.083  | 0.063 | 0.000 | 0.000  | 0.000  | 0.000 | 0.000 | 0.000   | 0.000   | 0.000  | 0.013  | 0.000  | 0.033 |
| <b>TOTAL</b>            |                          | 12.563 | 15.708 | 5.646 | 19.875 | 16.813 | 11.708 | 9.542 | 5.833 | 10.833 | 15.708 | 4.292 | 9.188 | 123.208 | 170.000 | 10.146 | 36.179 | 42.529 | 9.504 |
